# Supplementary material for: In Vitro Evaluation of Neutral Aryloximes as Reactivators for Electrophorus eel Acetylcholinesterase Inhibited by Paraoxon
Source: MDPI journal article supplement (doi:10.3390/biom9100583), 2019-10-08
Supplement: s1 [file s1]

Supplementary Material

Table S1. Percent of *EeAChE* inhibition with POX.

| POX Concentration (mol/L) | % <i>EeAChE</i> Inhibition |
|---------------------------|----------------------------|
| 10 <sup>-9</sup>          | 5.1                        |
| 10 <sup>-8</sup>          | 5.0                        |
| 10 <sup>-7</sup>          | 1.7                        |
| 10 <sup>-6</sup>          | 22.4                       |
| 10 <sup>-5</sup>          | 93.3                       |
| 10 <sup>-4</sup>          | 92.5                       |
| 10 <sup>-3</sup>          | 72.1                       |
